# Supplementary material for: Occurrence, distribution and environmental risk of 19 anthelmintic drugs in river water and sediment from the Jinjiang River, China
Source: Royal Society of Chemistry journal article supplement (doi:10.1039/d3em00160a), 2023-01-01
Supplement: d3em00160a1.pdf [file d3em00160a1.pdf]

## Supplementary Information

### Occurrence, distribution and environmental risk of 19 anthelmintic drugs in river water and sediment from Jinjiang River, China

Sheng Yang<sup>1</sup>, Mengxi Liao<sup>1</sup>, Shijun Su<sup>1</sup>, Sanglan Ding<sup>1</sup>, Yiwen Li<sup>\*1,2</sup>, Zhiwei Gan<sup>\*1</sup>

1. College of Architecture and Environment, Sichuan University, Chengdu 610065, China

2. School of Chemical Engineering, Sichuan University, Chengdu 610065, China

Table S1 The physicochemical data and structures of anthelmintic compounds

| Anthelmintic Classes | Name        | CAS number | Structural formula                                                                    | solubility (mg/L) | logK <sub>ow</sub> | logK <sub>oc</sub> | pK <sub>a</sub> |
|----------------------|-------------|------------|---------------------------------------------------------------------------------------|-------------------|--------------------|--------------------|-----------------|
| Benzimidazoles       | Albendazole | 54965-21-8 | 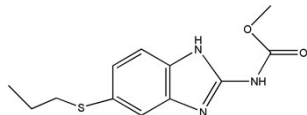 | 10                | 3.07               | 2.94               | 3.37 ; 9.93     |

| Anthelmintic Classes | Name          | CAS number | Structural formula                                                                    | solubility (mg/L) | logKow | logKoc | pKa             |
|----------------------|---------------|------------|---------------------------------------------------------------------------------------|-------------------|--------|--------|-----------------|
|                      | Ricobendazole | 54029-12-8 | 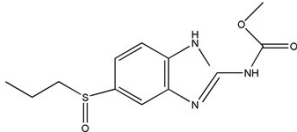   | 62                | 1.2    | \      | 3.5 ; 9.8 ; 7.8 |
|                      | Fenbendazole  | 43210-67-9 |    | 0.01-0.04         | 1.95   | 3.37   | \               |
|                      | Oxfendazole   | 53716-50-0 |    | 407.2             | 1.63   | \      | \               |
|                      | Flubendazole  | 31430-15-6 |    | 194.3             | 2.91   | 3.05   | 3.6 ; 9.6       |
|                      | Mebendazole   | 31431-39-7 |  | 10                | 2.71   | 3      | 3.5             |
|                      | Thiabendazole | 148-79-8   |  | \                 | 2.47   | 2.69   | 4.7 ; 12        |

| Anthelmintic Classes | Name               | CAS number | Structural formula                                                                                                                                                           | solubility (mg/L) | logKow | logKoc | pKa           |
|----------------------|--------------------|------------|------------------------------------------------------------------------------------------------------------------------------------------------------------------------------|-------------------|--------|--------|---------------|
|                      | Bithionol          | 97-18-7    | 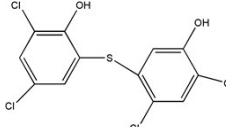                                                                                          | 0.2               | 5.91   | 4.67   | 4.82 ; 10.5   |
| Diphenylsulfides     | Febantel           | 58306-30-2 |                                                                                           | 76.9              | 1.53   | 1.45   | 4.8; 7.0; 7.4 |
| Imidazothiazoles     | Levamisole         | 14769-73-4 |                                                                                           | 1116              | 2.87   | 1.88   | 7.0           |
| Hexahydropyrazines   | Diethylcarbamazine | 1642-54-2  | <br> | 1*10 <sup>6</sup> | \      | \      | 7.7           |

| Anthelmintic Classes | Name         | CAS number  | Structural formula                                                                   | solubility (mg/L)    | logKow | logKoc    | pKa |
|----------------------|--------------|-------------|--------------------------------------------------------------------------------------|----------------------|--------|-----------|-----|
| Macrocyclic lactones | Abamectin    | 71751-41-2  | 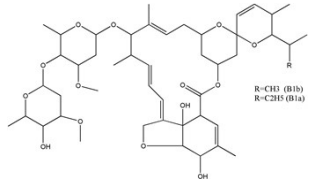  | 3.5*10 <sup>-4</sup> | 4      | 3.72-4.48 | \   |
|                      | Doramectin   | 117704-25-3 |    | \                    | 4.41   | \         | \   |
|                      | Eprinomectin | 70288-86-7  |   | \                    | 5.4    | \         | \   |
|                      | Ivermectin   | 123997-26-2 |  | \                    | 3.22   | \         | \   |

| Anthelmintic Classes  | Name       | CAS number  | Structural formula                                                                  | solubility (mg/L)    | logKow | logKoc | pKa  |
|-----------------------|------------|-------------|-------------------------------------------------------------------------------------|----------------------|--------|--------|------|
|                       | Moxidectin | 113507-06-5 | 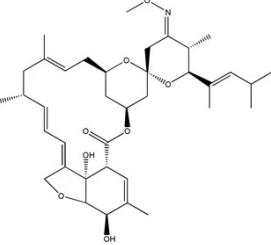 | 4                    | 4.77   | 3.9    | \    |
| Salicylanilides       | Closantel  | 57808-65-8  |  | $1.5 \times 10^{-5}$ | 8.11   | 5.72   | 4.18 |
| Tetrahydropyrimidines | Morantel   | 15686-83-6  |  | 10                   | 3.14   | 2.60   | \    |

| Anthelmintic Classes | Name     | CAS number | Structural formula                                                                                                                                  | solubility (mg/L)   | logKow | logKoc | pKa |
|----------------------|----------|------------|-----------------------------------------------------------------------------------------------------------------------------------------------------|---------------------|--------|--------|-----|
|                      | Pyrantel | 26155-31-7 | 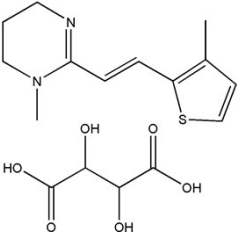<br><chem>CN1CCN(C1)/C=N/C=C/C2=CC=C(S2)C3C(O)C(O)C(=O)O3</chem> | 1.5*10 <sup>5</sup> | \      | \      | \   |

Table S2 Geographical information and type of the sampling sites

| Sampling sites | Description   | Latitude      | Longitude  |
|----------------|---------------|---------------|------------|
| S1             | Suburban area | 30°49'35"     | 103°58'16" |
| S2             | Suburban area | 30°49'3"      | 103°58'32" |
| S3             | Upstream      | Suburban area | 103°59'19" |
| S4             |               | Suburban area | 104°0'36"  |
| S5             |               | Urban area    | 104°2'6"   |
| S6             | Urban area    | 30°43'2"      | 104°3'26"  |
| S7             | Urban area    | 30°41'23"     | 104°3'28"  |
| S8             | Urban area    | 30°39'54"     | 104°05'28" |
| S9             | Urban area    | 30°39'32"     | 104°2'5"   |
| S10            | Urban area    | 30°39'44"     | 104°2'3"   |
| S11            | Urban area    | 30°39'35"     | 104°2'13"  |
| S12            | Urban area    | 30°38'58"     | 104°3'43"  |
| S13            | Midstream     | Urban area    | 104°4'58"  |
| S14            |               | Urban area    | 104°5'14"  |
| S15            | Urban area    | 30°35'31"     | 104°4'51"  |
| S16            | Urban area    | 30°33'38"     | 104°4'51"  |
| S17            | Urban area    | 30°31'47"     | 104°3'38"  |
| S18            | Urban area    | 30°30'26"     | 104°2'41"  |
| S19            | Suburban area | 30°29'16"     | 104°3'7"   |
| S20            | Downstream    | Suburban area | 104°2'31"  |

|     |               |           |            |
|-----|---------------|-----------|------------|
| S21 | Suburban area | 30°25'58" | 104°1'22"  |
| S22 | Suburban area | 30°24'49" | 104°0'23"  |
| S23 | Suburban area | 30°23'39" | 103°59'3"  |
| S24 | Suburban area | 30°21'39" | 103°57'50" |
| S25 | Suburban area | 30°19'28" | 103°58'18" |
| S26 | Suburban area | 30°18'14" | 103°56'27" |
| S27 | Suburban area | 30°16'12" | 103°55'60" |
| S28 | Suburban area | 30°13'32" | 103°54'41" |

---



Table S3 Mass spectrometer parameters for determination of target compound

| Name   | ESI mode | Retention time (min) | Precursor ion (m/z) | Daughter ions | DP <sup>a</sup> (volts) | EP <sup>b</sup> (volts) | CE <sup>c</sup> (volts) | CXP <sup>d</sup> (volts) | Corresponding internal standard |
|--------|----------|----------------------|---------------------|---------------|-------------------------|-------------------------|-------------------------|--------------------------|---------------------------------|
| ALB    | positive | 4.18                 | 266                 | 234           | 100                     | 10                      | 29                      | 12                       | ALB-D7                          |
|        |          |                      |                     | 190.9         | 100                     | 10                      | 44                      | 12                       |                                 |
| ALB-d7 | positive | 4.18                 | 273.2               | 241.1         | 108                     | 10                      | 28                      | 12                       |                                 |
|        |          |                      |                     | 234           | 108                     | 10                      | 45                      | 12                       |                                 |
| RIC    | positive | 3.33                 | 282                 | 240           | 85                      | 10                      | 19                      | 10                       | ALB-D7                          |
|        |          |                      |                     | 208           | 85                      | 10                      | 34                      | 10                       |                                 |
| FEN    | positive | 4.32                 | 300                 | 268           | 120                     | 10                      | 30                      | 10                       | FEN-D3                          |
|        |          |                      |                     | 158.9         | 120                     | 10                      | 46                      | 10                       |                                 |
| FEN-d3 | positive | 4.32                 | 303.2               | 268.1         | 120                     | 10                      | 30                      | 10                       |                                 |
|        |          |                      |                     | 159           | 120                     | 10                      | 46                      | 10                       |                                 |
| OXF    | positive | 3.55                 | 316.3               | 159           | 110                     | 10                      | 45                      | 11                       | FEN-D3                          |
|        |          |                      |                     | 191.1         | 110                     | 10                      | 28                      | 11                       |                                 |
| FLU    | positive | 3.97                 | 314.2               | 282           | 120                     | 10                      | 33                      | 13                       | FEN-D3                          |
|        |          |                      |                     | 122.9         | 120                     | 10                      | 48                      | 13                       |                                 |
| MEB    | positive | 3.89                 | 296.1               | 263.9         | 120                     | 10                      | 30                      | 8                        | FEN-D3                          |
|        |          |                      |                     | 105.1         | 120                     | 10                      | 43                      | 8                        |                                 |
| THI    | positive | 3.19                 | 202.1               | 175           | 80                      | 10                      | 35                      | 8                        | THI-D4                          |
|        |          |                      |                     | 130.9         | 80                      | 10                      | 45                      | 8                        |                                 |
| THI-d4 | positive | 3.19                 | 206                 | 179.1         | 80                      | 10                      | 31                      | 10                       |                                 |
|        |          |                      |                     | 135.2         | 80                      | 10                      | 46                      | 10                       |                                 |
| FEB    | positive | 4.35                 | 447.1               | 383.1         | 95                      | 6                       | 27                      | 5                        | FEB-D6                          |
|        |          |                      |                     | 415           | 95                      | 6                       | 19                      | 5                        |                                 |
| FEB-d6 | positive | 4.35                 | 453.1               | 383.1         | 95                      | 6                       | 27                      | 5                        |                                 |
|        |          |                      |                     | 418.1         | 95                      | 6                       | 19                      | 5                        |                                 |
| LEV    | positive | 2.5                  | 205.1               | 178           | 85                      | 6                       | 29                      | 11                       | LEV-D5                          |
|        |          |                      |                     | 123           | 85                      | 10                      | 39                      | 11                       |                                 |
| LEV-d5 | positive | 2.5                  | 210.1               | 183.1         | 95                      | 10                      | 30                      | 10                       |                                 |
|        |          |                      |                     | 128.1         | 95                      | 10                      | 38                      | 11                       |                                 |
| DIE    | positive | 2.28                 | 200.2               | 100.2         | 60                      | 10                      | 20                      | 10                       | DIE-D3                          |
|        |          |                      |                     | 127.1         | 60                      | 10                      | 20                      | 10                       |                                 |
| DIE-d3 | positive | 2.28                 | 203                 | 100.1         | 70                      | 10                      | 21                      | 10                       |                                 |
|        |          |                      |                     | 130.1         | 70                      | 10                      | 19                      | 10                       |                                 |
| ABA    | positive | 5.07                 | 890.5               | 305.1         | 85                      | 10                      | 34                      | 14                       | ROXI-D7                         |
|        |          |                      |                     | 567.4         | 85                      | 10                      | 21                      | 14                       |                                 |
| DOR    | positive | 5.25                 | 916.5               | 331.2         | 80                      | 10                      | 35                      | 13                       | ROXI-D7                         |
|        |          |                      |                     | 593.3         | 80                      | 10                      | 22                      | 13                       |                                 |
| IVE    | positive | 5.5                  | 892.5               | 569.3         | 85                      | 10                      | 22                      | 9                        | ROXI-D7                         |

|         |          |      |       |       |      |     |     |     |         |
|---------|----------|------|-------|-------|------|-----|-----|-----|---------|
| EPR     | positive | 4.97 | 914.5 | 307.1 | 85   | 10  | 35  | 9   | ROXI-D7 |
|         |          |      |       | 186.1 | 110  | 10  | 25  | 13  |         |
|         |          |      |       | 154   | 110  | 10  | 62  | 13  |         |
| MOX     | positive | 5.34 | 640.4 | 528.3 | 95   | 10  | 13  | 10  | ROXI-D7 |
|         |          |      |       | 687.6 | 120  | 10  | 31  | 9   |         |
| ROXI-D7 | positive | 4.39 | 845.6 | 158.2 | 120  | 10  | 41  | 9   |         |
|         |          |      |       | 498.3 | 95   | 10  | 18  | 10  |         |
| PYR     | positive | 2.54 | 207   | 150   | 85   | 10  | 38  | 10  | LEV-D5  |
|         |          |      |       | 136.1 | 85   | 10  | 41  | 10  |         |
| MOR     | positive | 3.02 | 221.1 | 122.9 | 90   | 10  | 44  | 10  | LEV-D5  |
|         |          |      |       | 164.2 | 90   | 10  | 36  | 10  |         |
| BIT     | positive | 4.91 | 352.9 | 160.8 | -60  | -10 | -32 | -10 | FEB-D6  |
|         |          |      |       | 191.9 | -60  | -11 | -34 | -10 |         |
| CLO     | positive | 4.87 | 660.7 | 126.9 | -120 | -12 | -97 | -8  | CLO-C6  |
|         |          |      |       | 344.8 | -120 | -13 | -51 | -8  |         |
| CLO-C6  | positive | 4.87 | 666.6 | 126.7 | -120 | -10 | -90 | -10 |         |
|         |          |      |       | 350.7 | -120 | -10 | -50 | -10 |         |

---

a: declustering potential;

b: entrance potential;

c: collision energy;

d: collision outlet potential.

Table S4 The method validation of target compounds

| Analyte | External calibration R <sup>2</sup> | IDLs <sup>a</sup><br>(ng/L) | IQLs <sup>b</sup><br>(ng/L) | River water       |                   | Sediment |        |
|---------|-------------------------------------|-----------------------------|-----------------------------|-------------------|-------------------|----------|--------|
|         |                                     |                             |                             | MDLs <sup>c</sup> | MQLs <sup>d</sup> | MDLs     | MQLs   |
|         |                                     |                             |                             | (ng/L)            | (ng/L)            | (ng/g)   | (ng/g) |
| ALB     | 0.9992                              | 1.8                         | 6                           | 0.03              | 0.09              | 0.02     | 0.07   |
| RIC     | 0.9984                              | 1.8                         | 6                           | 0.06              | 0.20              | 0.06     | 0.20   |
| FLU     | 0.9995                              | 6                           | 20                          | 0.09              | 0.30              | 0.20     | 0.61   |
| FEN     | 0.9996                              | 0.6                         | 2                           | 0.03              | 0.08              | 0.01     | 0.03   |
| OXF     | 0.9994                              | 1.8                         | 6                           | 0.05              | 0.14              | 0.03     | 0.11   |
| MEB     | 0.9995                              | 1.8                         | 6                           | 0.06              | 0.19              | 0.05     | 0.16   |
| THI     | 0.9995                              | 1.8                         | 6                           | 0.05              | 0.16              | 0.04     | 0.12   |
| FEB     | 0.9991                              | 0.6                         | 2                           | 0.03              | 0.09              | 0.02     | 0.06   |
| LEV     | 0.9991                              | 1.8                         | 6                           | 0.05              | 0.18              | 0.05     | 0.16   |
| DIE     | 0.9997                              | 6                           | 20                          | 0.08              | 0.25              | 0.15     | 0.46   |
| ABA     | 0.9992                              | 18                          | 60                          | 0.23              | 0.70              | 0.34     | 1.03   |
| DOR     | 0.9983                              | 6                           | 20                          | 0.22              | 0.65              | 0.33     | 1.01   |
| IVE     | 0.9998                              | 1.8                         | 6                           | 0.09              | 0.29              | 0.11     | 0.34   |
| EPR     | 0.9992                              | 18                          | 60                          | 0.24              | 0.75              | 0.38     | 1.14   |
| MOX     | 0.9995                              | 6                           | 20                          | 0.12              | 0.35              | 0.27     | 0.82   |
| PYR     | 0.9995                              | 18                          | 60                          | 0.35              | 1.07              | 0.75     | 2.26   |
| MOR     | 0.9994                              | 18                          | 60                          | 0.22              | 0.67              | 0.33     | 1.01   |
| BIT     | 0.9991                              | 6                           | 20                          | 0.09              | 0.26              | 0.11     | 0.35   |
| CLO     | 0.9991                              | 1.8                         | 6                           | 0.03              | 0.10              | 0.02     | 0.06   |

a: instrument detection limits;

b: instrument quantitation limits;

c: method detection limits;

d: method quantitation limits

Table S5 The results of absolute recoveries and matrix effect for target compound in the water and sediment samples (n=3, recovery (RSD) (%), matrix effect (RSD) (%))

| Target compound              | Matrix effect (RSD) (%) |         |          |         | Recovery (RSD) (%) |         |          |        |        |         |
|------------------------------|-------------------------|---------|----------|---------|--------------------|---------|----------|--------|--------|---------|
|                              | River water             |         | Sediment |         | River water        |         | Sediment |        |        |         |
| Spiked concentration (ng/mL) | 5                       | 10      | 50       | 100     | 50 ng/g            | 5       | 10       | 50     | 100    | 50 ng/g |
| ALB                          | 86±3.6                  | 82±5.5  | 80±2.6   | 81±3.2  | 68±8.1             | 82±6.5  | 86±5.0   | 89±3.8 | 85±6.2 | 69±6.6  |
| RIC                          | 88±5.4                  | 85±2.5  | 85±4.0   | 86±2.8  | 88±9.9             | 90±3.7  | 92±7.2   | 90±4.8 | 94±5.5 | 86±13.6 |
| FEN                          | 78±3.2                  | 81±3.6  | 77±9.0   | 80±3.9  | 71±5.8             | 84±2.6  | 83±6.1   | 81±8.4 | 85±3.1 | 58±4.2  |
| OXF                          | 90±3.9                  | 90±1.5  | 95±4.2   | 102±4.6 | 81±6.4             | 102±4.0 | 91±3.9   | 92±2.8 | 94±4.7 | 90±5.4  |
| FLU                          | 83±5.8                  | 80±4.9  | 85±6.0   | 84±4.0  | 77±5.7             | 86±4.6  | 87±3.7   | 88±6.9 | 89±3.8 | 83±8.8  |
| MEB                          | 90±3.0                  | 92±3.6  | 91±2.8   | 87±6.8  | 83±6.6             | 90±2.1  | 88±3.6   | 92±2.5 | 91±2.8 | 81±4.2  |
| THI                          | 83±2.2                  | 84±6.8  | 81±6.0   | 83±3.0  | 75±9.4             | 88±3.2  | 87±5.6   | 89±4.9 | 90±2.1 | 78±7.3  |
| FEB                          | 75±11.5                 | 80±8.9  | 81±6.3   | 79±3.3  | 69±6.9             | 82±4.5  | 80±3.2   | 79±6.8 | 80±5.2 | 69±8.1  |
| LEV                          | 91±3.3                  | 90±2.3  | 93±7.7   | 89±6.4  | 86±6.8             | 90±3.9  | 88±2.5   | 87±4.0 | 87±4.4 | 80±5.6  |
| DIE                          | 89±3.1                  | 88±5.7  | 87±3.6   | 90±3.8  | 90±7.7             | 84±2.4  | 82±4.6   | 84±3.5 | 80±3.7 | 62±7.6  |
| ABA                          | 83±4.5                  | 84±12.4 | 84±3.8   | 86±8.2  | 81±6.9             | 49±4.5  | 47±5.2   | 50±6.2 | 53±4.6 | 58±3.9  |
| DOR                          | 85±8.8                  | 86±4.5  | 84±4.7   | 89±3.4  | 73±7.8             | 41±6.4  | 43±3.8   | 45±2.5 | 45±7.1 | 48±5.3  |
| IVE                          | 91±6.0                  | 89±4.9  | 88±3.9   | 92±5.6  | 83±6.1             | 43±3.1  | 44±5.0   | 42±2.3 | 46±4.7 | 45±8.8  |
| EPR                          | 89±4.0                  | 84±2.3  | 85±4.5   | 82±5.6  | 76±5.5             | 46±2.9  | 45±2.3   | 42±6.3 | 47±4.7 | 59±4.3  |
| MOX                          | 80±4.4                  | 80±3.8  | 84±4.4   | 81±5.7  | 80±5.2             | 43±4.7  | 37±11.2  | 39±6.0 | 40±4.6 | 42±3.8  |
| PYR                          | 89±5.4                  | 87±8.2  | 86±6.6   | 90±8.4  | 82±8.9             | 82±3.9  | 83±5.5   | 85±6.9 | 86±4.5 | 79±6.7  |

|     |        |        |        |        |         |        |        |         |        |        |
|-----|--------|--------|--------|--------|---------|--------|--------|---------|--------|--------|
| MOR | 78±4.8 | 77±7.1 | 80±6.5 | 78±3.7 | 83±10.5 | 76±2.8 | 74±6.5 | 78±4.1  | 81±5.3 | 81±7.1 |
| BIT | 76±1.7 | 75±5.8 | 73±1.7 | 76±2.7 | 53±14.7 | 53±9.7 | 51±9.2 | 49±11.0 | 54±8.1 | 31±3.1 |
| CLO | 57±4.6 | 59±8.6 | 56±6.8 | 57±9.5 | 48±5.5  | 26±2.4 | 34±6.7 | 26±4.1  | 25±3.4 | 10±1.7 |

---

Table S6 Toxicological data of target anthelmintics for aquatic ecosystems.

| Target ADs | Species group | Species         | Endpoint test     | Exposure time (h) | Critical effects | Toxicological data (ng/L) | Reference                | AF   | PNEC <sub>Ecotox</sub> (ng/L) |
|------------|---------------|-----------------|-------------------|-------------------|------------------|---------------------------|--------------------------|------|-------------------------------|
| ALB        | Fish          | zebrafish       | Growth inhibition | 144               | NOEC             | $2.2 \times 10^4$         | (Carlsson. et al., 2013) | 100  | 220                           |
|            | Fish          | zebrafish       | Growth inhibition | 144               | EC <sub>50</sub> | $42 \times 10^3$          | (Carlsson. et al., 2013) | 1000 | 42                            |
|            | Daphnia magna | <i>D. magna</i> | Growth inhibition | 96                | EC <sub>50</sub> | $42.8 \times 10^3$        | (Oh. et al., 2006)       | 1000 | 42.8                          |
| RIC        | /             |                 |                   |                   |                  |                           |                          |      |                               |
| FEN        | Fish          | zebrafish       | Growth inhibition | 144               | EC <sub>50</sub> | $2.4 \times 10^4$         | (Carlsson. et al., 2013) | 1000 | 24                            |
|            | Fish          | zebrafish       | Growth inhibition | 144               | NOEC             | $2.0 \times 10^4$         | (Carlsson. et al., 2013) | 100  | 200                           |
|            | Daphnia magna | <i>D. magna</i> | Growth inhibition | 96                | EC <sub>50</sub> | $9.8 \times 10^3$         | (Oh. et al., 2006)       | 1000 | 9.8                           |
|            | Fish          | zebrafish       | Growth inhibition | 144               | EC <sub>50</sub> | $6.8 \times 10^6$         | (Carlsson. et al., 2013) | 1000 | $6.8 \times 10^3$             |

|     |               |                         |                   |     |                  |                    |                          |      |                   |
|-----|---------------|-------------------------|-------------------|-----|------------------|--------------------|--------------------------|------|-------------------|
|     | Fish          | zebrafish               | Growth inhibition | 144 | NOEC             | $4.6 \times 10^6$  | (Carlsson. et al., 2013) | 100  | $4.6 \times 10^4$ |
|     | Daphnia magna | <i>D. magna</i>         | Growth inhibition | 96  | EC <sub>50</sub> | $5.4 \times 10^5$  | (Oh. et al., 2006)       | 1000 | 540               |
| FLU | Daphnia magna | <i>D. magna</i>         | Growth inhibition | 96  | EC <sub>50</sub> | $54.8 \times 10^3$ | (Oh. et al., 2006)       | 1000 | 54.8              |
| MEB | organisms     | <i>Hybrid Snakehead</i> | Growth inhibition | 48  | EC <sub>50</sub> | $2.1 \times 10^6$  | (Lin. et al., 2010)      | 1000 | $2.1 \times 10^3$ |
| THI | Daphnia magna | <i>D. magna</i>         | Growth inhibition | 96  | EC <sub>50</sub> | $3.1 \times 10^5$  | (Oh. et al., 2006)       | 1000 | 308.8             |
| BIT | organisms     | <i>Oryzias latipes</i>  | Growth inhibition | 96  | EC <sub>50</sub> | $2.4 \times 10^5$  | (Yoshimura et al., 2005) | 1000 | 240               |
|     | Fish          | zebrafish               | Growth inhibition | 144 | NOEC             | $2.0 \times 10^5$  | (Carlsson. et al., 2013) | 100  | $2 \times 10^3$   |
| FEB | Fish          | zebrafish               | Growth inhibition | 144 | EC <sub>50</sub> | $3.4 \times 10^5$  | (Carlsson. et al., 2013) | 1000 | 340               |
|     | Daphnia magna | <i>D. magna</i>         | Growth inhibition | 96  | EC <sub>50</sub> | $2.03 \times 10^4$ | (Oh. et al., 2006)       | 1000 | 20.3              |

|     |               |                  |                   |     |                  |                        |                               |      |                        |
|-----|---------------|------------------|-------------------|-----|------------------|------------------------|-------------------------------|------|------------------------|
| LEV | organisms     | Oryzias latipes  | Growth inhibition | 96  | EC <sub>50</sub> | 37.3 × 10 <sup>6</sup> | (Yoshimura et al., 2005)      | 1000 | 37.3 × 10 <sup>3</sup> |
| DIE | /             |                  |                   |     |                  |                        |                               |      |                        |
|     | algae         | S. subspicatus   | Growth inhibition | 72  | EC <sub>50</sub> | 4.4 × 10 <sup>6</sup>  | (Tişler. et al., 2006)        | 1000 | 4400                   |
| ABA | organisms     | zebrafish        | Growth inhibition | 96  | EC <sub>50</sub> | 5.04 × 10 <sup>4</sup> | (Tişler. et al., 2006)        | 1000 | 50.4                   |
|     | organisms     | zebrafish        | Growth inhibition | 48  | EC <sub>50</sub> | 3.3 × 10 <sup>4</sup>  | (Novelli, Vieira et al. 2012) | 1000 | 33                     |
|     | organisms     | zebrafish        | Growth inhibition | 144 | EC <sub>50</sub> | 5.8 × 10 <sup>5</sup>  | (Carlsson. et al., 2013)      | 1000 | 580                    |
| DOR | organisms     | zebrafish        | Growth inhibition | 144 | NOEC             | 4.6 × 10 <sup>5</sup>  | (Carlsson. et al., 2013)      | 100  | 4.6 × 10 <sup>3</sup>  |
|     | Daphnia magna | <i>D. magna</i>  | Growth inhibition | 48  | EC <sub>50</sub> | 25                     | (Boxal. et al., 2003)         | 1000 | 0.025                  |
| IVE | organisms     | zebrafish embryo | Growth inhibition | 144 | EC <sub>50</sub> | 4.4 × 10 <sup>5</sup>  | (Carlsson. et al., 2013)      | 1000 | 440                    |
|     | organisms     | zebrafish embryo | Growth inhibition | 144 | NOEC             | 2.2 × 10 <sup>5</sup>  | (Carlsson. et al., 2013)      | 100  | 2.2 × 10 <sup>3</sup>  |



---

|     |               |                 |                   |    |                  |                       |                       |      |      |
|-----|---------------|-----------------|-------------------|----|------------------|-----------------------|-----------------------|------|------|
| EPR | Daphnia magna | <i>D. magna</i> | Growth inhibition | 48 | EC <sub>50</sub> | 4.5 × 10 <sup>2</sup> | (Boxal. et al., 2003) | 1000 | 0.45 |
| MOX | /             |                 |                   |    |                  |                       |                       |      |      |
| CLO | /             |                 |                   |    |                  |                       |                       |      |      |
| PYR | /             |                 |                   |    |                  |                       |                       |      |      |
| MOR | /             |                 |                   |    |                  |                       |                       |      |      |

---

Carlsson, G., Patring, J., Kreuger, J., Norrgren, L., & Oskarsson, A. (2013). Toxicity of 15 veterinary pharmaceuticals in zebrafish (*Danio rerio*) embryos. *Aquatic toxicology*, 126, 30-41.

Boxal, A., Kolpin, D., Halling Sørensen, B., & Tolls. Are veterinary medicines causing environmental risks. *Environ Sci Technol* 2003; 37: 286-294.

Oh, S. J., Park, J., Lee, M. J., Park, S. Y., Lee, J. H., & Choi, K. (2006). Ecological hazard assessment of major veterinary benzimidazoles: acute and chronic toxicities to aquatic microbes and invertebrates. *Environmental Toxicology and Chemistry: An International Journal*, 25(8), 2221-2226.

Yoshimura, H., & Endoh, Y. S. (2005). Acute toxicity to freshwater organisms of antiparasitic drugs for veterinary use. *Environmental Toxicology: An International Journal*, 20(1), 60-66.

Tišler, T., & Eržen, N. K. (2006). Abamectin in the aquatic environment. *Ecotoxicology*, 15(6), 495-502.

Qi-cun, L. I. N. (2010). Acute Toxicity Test of 6 Kinds of Common Drug on Hybrid Snakehead [J]. *Journal of Anhui Agricultural Sciences*, 9.

Novelli, A., et al. (2012). "Lethal effects of abamectin on the aquatic organisms *Daphnia similis*, *Chironomus xanthus* and *Danio rerio*." *Chemosphere* 86(1): 36-40.





|                   |       |       |       |       |       |       |       |       |       |       |       |       |      |      |      |      |      |       |       |
|-------------------|-------|-------|-------|-------|-------|-------|-------|-------|-------|-------|-------|-------|------|------|------|------|------|-------|-------|
| Mean              | 7.94  | 1.31  | 0.70  | 0.82  | 15.88 | 1.83  | 2.40  | 0.25  | 0.73  | 0.88  | 1.85  | 2.13  | nq   | nq   | nq   | nq   | nq   | nq    | nq    |
| Med. <sup>c</sup> | 2.91  | 0.37  | 0.22  | 0.47  | 0.69  | 0.39  | 0.32  | 0.10  | nq    | 0.18  | 0.31  | nq    | nd   | nd   | nd   | nd   | nd   | nq    | nd    |
| Feq. <sup>d</sup> | 24/25 | 25/25 | 24/25 | 25/25 | 24/25 | 22/25 | 22/25 | 18/25 | 25/25 | 16/25 | 23/25 | 22/25 | 4/25 | 7/25 | 9/25 | 8/25 | 4/25 | 11/25 | 11/25 |

Table S8 The K<sub>d,s</sub> value of 19 anthelmintics

| Compound                   | ALB   | RIC | FEN  | OXF | FLU  | MEB  | THI | FEB | BIT | LEV  | CLO  | DIE  | ABA | DOR | IVE | EPR | MOX | PYR | MOR |
|----------------------------|-------|-----|------|-----|------|------|-----|-----|-----|------|------|------|-----|-----|-----|-----|-----|-----|-----|
| K <sub>d,s</sub><br>Summer | 24921 | 112 | 1246 | 71  | 3960 | 2050 | 174 | 389 | -   | 1476 | 730  | 1953 | -   | -   | -   | -   | -   | 428 | -   |
| Winter                     | 218   | 24  | 61   | 203 | 964  | 534  | 296 | 130 | -   | 194  | 1270 | 2000 | -   | -   | 459 | -   | -   | -   | -   |

Table S9 Correlation analysis among different anthelmintics in the Jinjiang River in summer

|     | ALB    | RIC    | FEN    | OXF    | FLU    | MEB    | THI    | FEB    | BIT    | LEV    | CLO    | DIE    | ABA    | DOR    | IVE   | EPR    | MOX   | PYR   | MOR |
|-----|--------|--------|--------|--------|--------|--------|--------|--------|--------|--------|--------|--------|--------|--------|-------|--------|-------|-------|-----|
| ALB | 1      |        |        |        |        |        |        |        |        |        |        |        |        |        |       |        |       |       |     |
| RIC | 0.122  | 1      |        |        |        |        |        |        |        |        |        |        |        |        |       |        |       |       |     |
| FEN | .715** | .438*  | 1      |        |        |        |        |        |        |        |        |        |        |        |       |        |       |       |     |
| OXF | 0.084  | .618** | .433*  | 1      |        |        |        |        |        |        |        |        |        |        |       |        |       |       |     |
| FLU | 0.347  | .522** | .708** | .843** | 1      |        |        |        |        |        |        |        |        |        |       |        |       |       |     |
| MEB | .416*  | .617** | .768** | .876** | .916** | 1      |        |        |        |        |        |        |        |        |       |        |       |       |     |
| THI | 0.334  | .602** | .672** | .875** | .850** | .916** | 1      |        |        |        |        |        |        |        |       |        |       |       |     |
| FEB | -0.426 | 0.14   | -0.135 | -0.253 | -0.274 | -0.303 | -0.248 | 1      |        |        |        |        |        |        |       |        |       |       |     |
| BIT | -0.092 | .426*  | 0.323  | .561** | .550** | .509** | .420*  | -0.022 | 1      |        |        |        |        |        |       |        |       |       |     |
| LEV | .666** | .496** | .841** | .405*  | .583** | .699** | .697** | 0.016  | 0.031  | 1      |        |        |        |        |       |        |       |       |     |
| CLO | 0.316  | .412*  | .644** | .456*  | .611** | .625** | .488** | -0.085 | .501** | .444*  | 1      |        |        |        |       |        |       |       |     |
| DIE | .563** | 0.375  | .792** | 0.375  | .577** | .638** | .652** | 0.172  | 0.024  | .934** | .499** | 1      |        |        |       |        |       |       |     |
| ABA | 0.124  | 0.396  | .487*  | 0.257  | .424*  | .403*  | 0.306  | .592** | .454*  | 0.367  | .718** | .486*  | 1      |        |       |        |       |       |     |
| DOR | 0.069  | 0.392  | .448*  | 0.245  | .403*  | 0.374  | 0.269  | .632** | .444*  | 0.32   | .660** | .450*  | .974** | 1      |       |        |       |       |     |
| IVE | .578** | .421*  | .675** | .502*  | .660** | .701** | .548** | -0.411 | .438*  | .468*  | .826** | .463*  | .503*  | .495*  | 1     |        |       |       |     |
| EPR | 0.17   | -0.284 | 0.176  | -0.176 | 0.069  | -0.109 | -0.137 | 0.361  | 0.159  | -0.05  | 0.197  | 0.088  | .517** | .544** | 0.135 | 1      |       |       |     |
| MOX | 0.047  | 0.323  | .417*  | 0.206  | 0.371  | 0.366  | 0.267  | .714** | 0.398  | 0.381  | .468*  | .464*  | .828** | .806** | 0.176 | .410*  | 1     |       |     |
| PYR | 0.14   | .789** | 0.227  | 0.182  | 0.113  | 0.243  | 0.185  | 0.236  | 0.155  | 0.335  | 0.174  | 0.19   | 0.261  | 0.218  | 0.138 | -0.283 | 0.377 | 1     |     |
| MOR | .789** | 0.202  | .794** | 0.315  | .534** | .583** | .598** | -0.175 | -0.017 | .836** | 0.263  | .820** | 0.187  | 0.199  | .490* | 0.232  | 0.207 | 0.049 | 1   |

\*\* . Correlation is significant at the 0.01 level (2-tailed)

\* . Correlation is significant at the 0.05 level (2-tailed)

Table S10 Correlation analysis among different anthelmintics in the Jinjiang River in winter

|     | ALB    | RIC    | FEN    | OXF    | FLU    | MEB    | THI    | FEB    | BIT    | LEV    | CLO    | DIE    | ABA    | DOR    | IVE    | EPR    | MOX   | PYR   | MOR |
|-----|--------|--------|--------|--------|--------|--------|--------|--------|--------|--------|--------|--------|--------|--------|--------|--------|-------|-------|-----|
| ALB | 1      |        |        |        |        |        |        |        |        |        |        |        |        |        |        |        |       |       |     |
| RIC | .644** | 1      |        |        |        |        |        |        |        |        |        |        |        |        |        |        |       |       |     |
| FEN | .907** | .499** | 1      |        |        |        |        |        |        |        |        |        |        |        |        |        |       |       |     |
| OXF | .810** | .732** | .847** | 1      |        |        |        |        |        |        |        |        |        |        |        |        |       |       |     |
| FLU | .820** | .655** | .788** | .747** | 1      |        |        |        |        |        |        |        |        |        |        |        |       |       |     |
| MEB | .927** | .721** | .901** | .946** | .788** | 1      |        |        |        |        |        |        |        |        |        |        |       |       |     |
| THI | .875** | .606** | .913** | .827** | .864** | .868** | 1      |        |        |        |        |        |        |        |        |        |       |       |     |
| FEB | 0.195  | 0.057  | 0.107  | 0.162  | -0.052 | 0.238  | -0.049 | 1      |        |        |        |        |        |        |        |        |       |       |     |
| BIT | -0.028 | 0.151  | 0.039  | 0.113  | 0.03   | 0.111  | 0.126  | -0.176 | 1      |        |        |        |        |        |        |        |       |       |     |
| LEV | .886** | .620** | .934** | .854** | .829** | .898** | .954** | -0.049 | 0.112  | 1      |        |        |        |        |        |        |       |       |     |
| CLO | .554** | .477*  | .543** | .577** | .392*  | .662** | .522** | 0.305  | 0.128  | .513** | 1      |        |        |        |        |        |       |       |     |
| DIE | .509** | 0.094  | .650** | .557** | 0.313  | .508** | .505** | 0.215  | 0.025  | .525** | 0.135  | 1      |        |        |        |        |       |       |     |
| ABA | .384*  | -0.059 | .427*  | 0.199  | 0.296  | 0.234  | 0.33   | 0.004  | -0.314 | 0.291  | -0.097 | .398*  | 1      |        |        |        |       |       |     |
| DOR | 0.355  | -0.159 | .439*  | 0.177  | 0.23   | 0.214  | 0.334  | -0.016 | -0.263 | 0.288  | -0.047 | .448*  | .925** | 1      |        |        |       |       |     |
| IVE | 0.323  | -0.254 | .418*  | 0.141  | 0.317  | 0.178  | 0.228  | 0.072  | -0.376 | 0.214  | -0.213 | .404*  | .879** | .851** | 1      |        |       |       |     |
| EPR | 0.31   | -0.287 | .436*  | 0.162  | 0.264  | 0.206  | 0.241  | 0.028  | -0.25  | 0.254  | -0.179 | .404*  | .879** | .817** | .942** | 1      |       |       |     |
| MOX | 0.311  | 0.113  | .449*  | 0.29   | 0.347  | 0.242  | .387*  | -0.046 | -0.116 | 0.357  | -0.173 | .539** | .709** | .709** | .640** | .526** | 1     |       |     |
| PYR | .636** | .978** | .484*  | .689** | .651** | .700** | .610** | -0.056 | 0.176  | .630** | .458*  | 0.038  | -0.111 | -0.204 | -0.321 | -0.346 | 0.079 | 1     |     |
| MOR | .570** | 0.144  | .631** | .482*  | .529** | .480*  | .567** | -0.102 | -0.045 | .618** | -0.09  | .644** | .476*  | .419*  | .456*  | .503** | .495* | 0.181 | 1   |

\*\* . Correlation is significant at the 0.01 level (2-tailed)

\* . Correlation is significant at the 0.05 level (2-tailed)

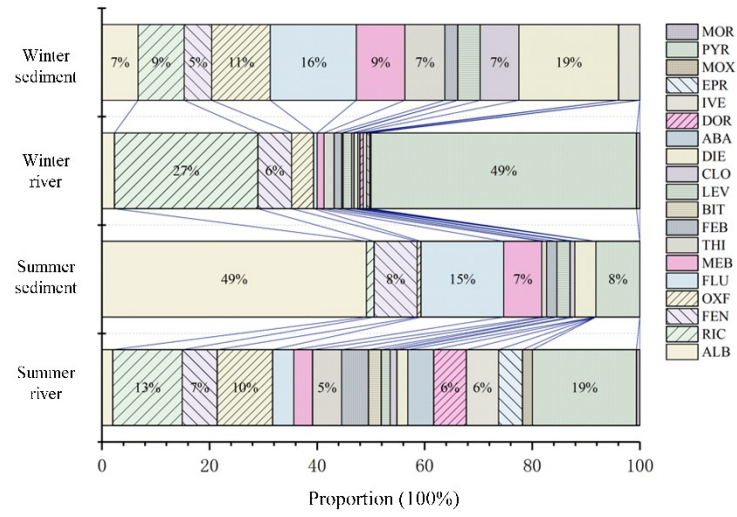

Fig. S1 Percentage compositions of 19 anthelmintics in the river and sediment samples in Chengdu, China
